# Supplementary figures and images for: Reproducibility of deep learning based scleral spur localisation and anterior chamber angle measurements from anterior segment optical coherence tomography images
Source: HighWire-hosted journal article supplement (doi:10.1136/bjophthalmol-2021-319798), 2022-01-28

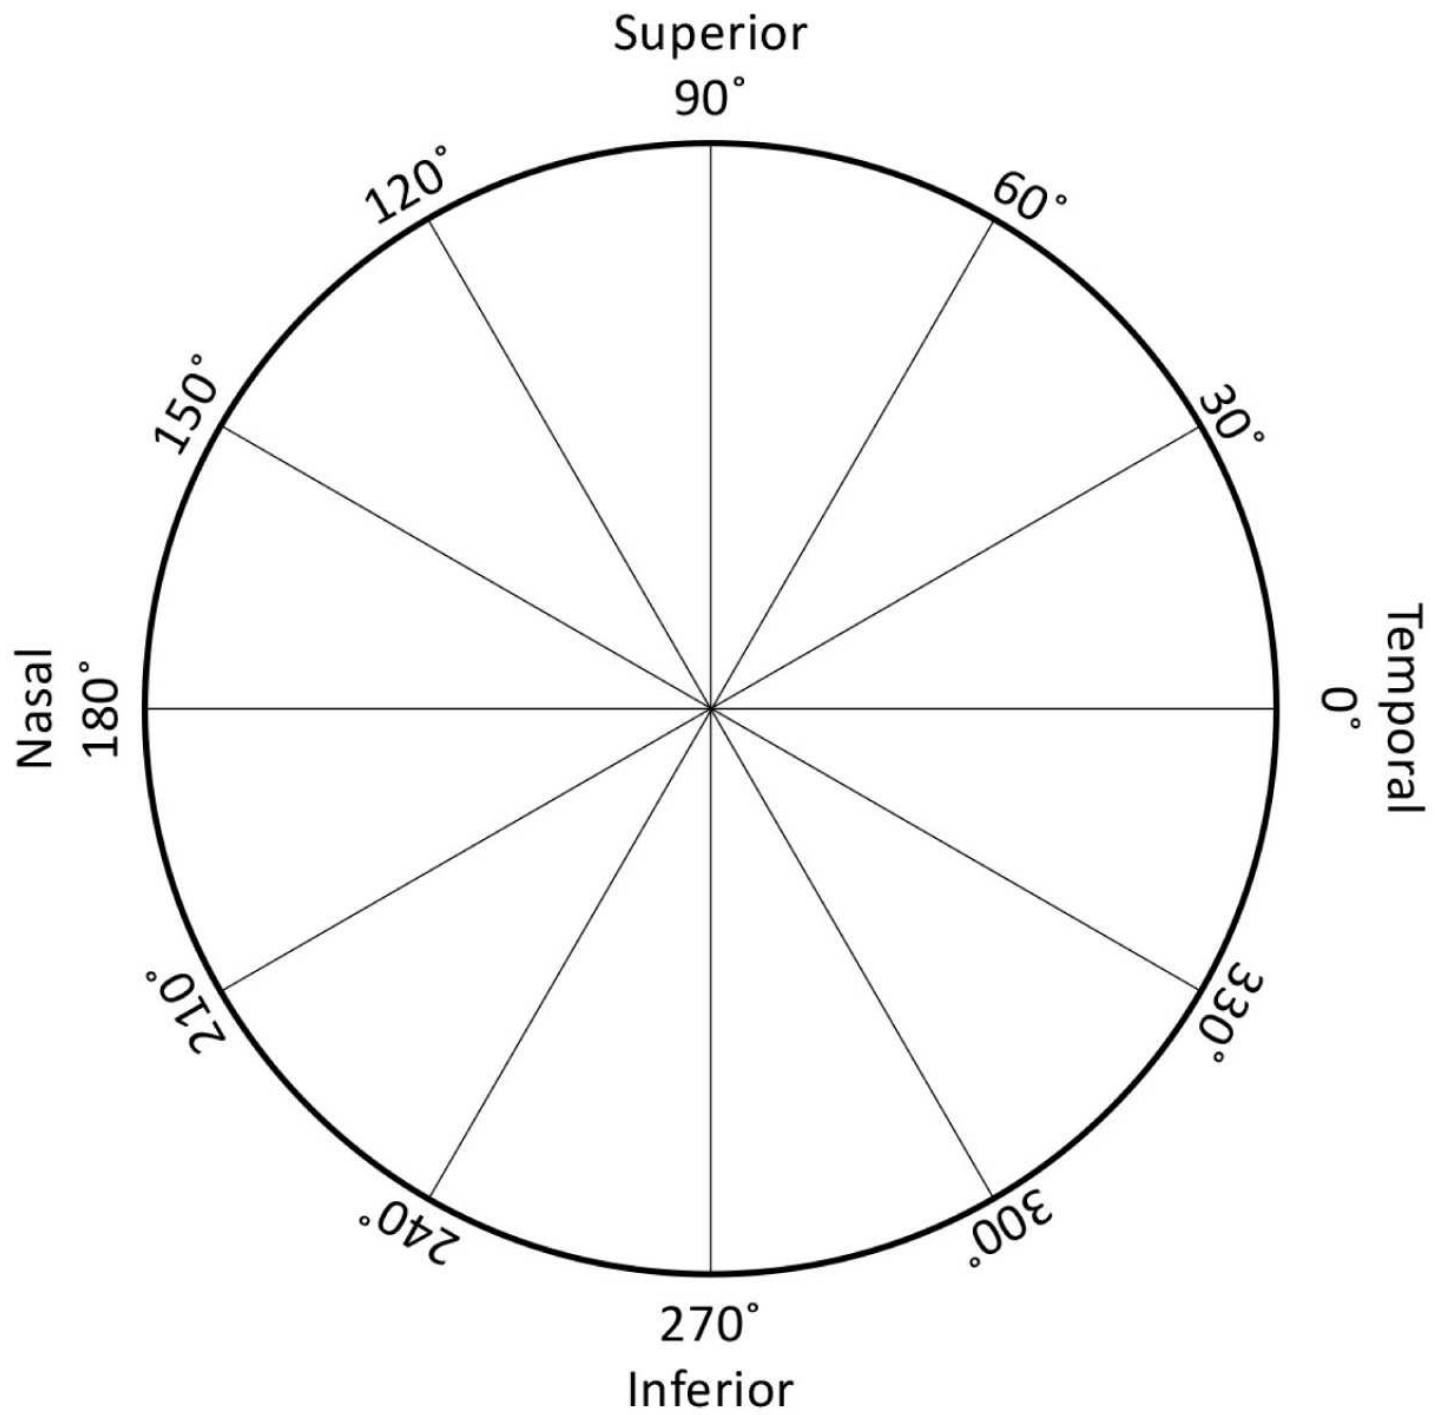

Supplement: bjophthalmol-2021-319798supp002_data_supplement.pdf [file bjophthalmol-2021-319798supp002_data_supplement.pdf]
